# Supplementary material for: Forming heterojunction: an effective strategy to enhance the photocatalytic efficiency of a new metal-free organic photocatalyst for water splitting
Source: PubMed Central journal article supplement (PMC4965868; doi:10.1038/srep29327), 2016-07-29
Supplement: srep29327-s1.pdf [file srep29327-s1.pdf]

## Supplementary Information for

### Forming heterojunction: an effective strategy to enhance the photocatalytic efficiency of a new metal-free organic photocatalyst for water splitting

Hengshuai Li,<sup>\*1,2</sup> Haiquan Hu,<sup>3</sup> Chunjiang Bao,<sup>1</sup> Feng Guo,<sup>3</sup> Xiaoming Zhang,<sup>2</sup> Xiaobiao Liu,<sup>2</sup> Juan Hua,<sup>2</sup> Jie Tan,<sup>2</sup> Aizhu Wang,<sup>2</sup> Hongcai Zhou,<sup>2</sup> Bo Yang,<sup>2</sup> Yuanyuan Qu,<sup>2</sup> Xiangdong Liu,<sup>2</sup>

<sup>1</sup>*School of Mechanical & Automotive Engineering, Liaocheng University, Liaocheng, 252059, China*

<sup>2</sup>*School of Physics and State Key Laboratory of Crystal Materials, Shandong University, Jinan 250100, China*

<sup>3</sup>*School of Physics Science and Information Technology, Liaocheng University, Liaocheng, 252059, China*

### Supplementary Table

**Table S1** The work function (WF) and band gap ( $E_g$ ) of two-, three-, four-, five-, and six-layer 2D g-C<sub>12</sub>N<sub>7</sub>H<sub>3</sub> computed with PBE function. The band gap differences ( $\Delta E_g$ ) between the multilayers and monolayer g-C<sub>12</sub>N<sub>7</sub>H<sub>3</sub> are shown.

| Layers            | 1    | 2    | 3    | 4    | 5    | 6    | n    |
|-------------------|------|------|------|------|------|------|------|
| WF(eV)            | 6.26 | 6.20 | 6.20 | 6.18 | 6.13 | 6.13 | ---- |
| $E_g$ (eV)        | 2.30 | 1.98 | 1.84 | 1.77 | 1.72 | 1.69 | 1.69 |
| $\Delta E_g$ (eV) | 0    | 0.32 | 0.46 | 0.53 | 0.58 | 0.61 | 0.61 |
